# Supplementary material for: Co-RISK: a tool to co-create impactful university–industry projects for natural hazard risk mitigation
Source: Copernicus journal article supplement (doi:10.5194/gc-7-35-2024), 2024-02-01
Supplement: Supplementary file 2 [file gc-7-35-2024-supplement.zip]

## Evaluation of the Co-RISK workshop

By filling in this evaluation, I confirm that I consent for this information to be used in the ROBUST project as described in the Participant Information sheet

### Your background & experience

Years in insurance:

|                                                                           |                                  |                                              |                                            |
|---------------------------------------------------------------------------|----------------------------------|----------------------------------------------|--------------------------------------------|
| <b>Worked for/at:</b><br><b>[ORGANISATION]</b><br>(circle all applicable) | Primary insurer                  | Reinsurer                                    | Cat Model Vendor                           |
|                                                                           | Consultant                       | Financial Investor (e.g. ILS/ILW/Cat. bonds) | Regulator                                  |
|                                                                           | Broker                           | University                                   | Research organisation<br>(e.g. Met Office) |
|                                                                           | Other relevant (please specify): |                                              |                                            |

|                                                                                      |                                        |         |                                                                     |
|--------------------------------------------------------------------------------------|----------------------------------------|---------|---------------------------------------------------------------------|
| <b>Job functions/roles:</b><br><b>[TRANSLATION STAGE]</b><br>(circle all applicable) | Risk Analyst                           | Manager | Research scientist (hazard/climate)                                 |
|                                                                                      | KE/facilitating translation of science |         | Policy response/modelling of <u>implications</u><br>(e.g. solvency) |
|                                                                                      | Other relevant (please specify):       |         |                                                                     |

Current seniority [rank 1-4]:

e.g. 1 = Analyst, 2 = Team Leader, 3 = Senior Manager, 4 = CEO/board

### Your knowledge of organisational viewpoints in the sector (i.e. positionality)

| 1. <u>Before the Co-RISK workshop</u> , how well do you think you understood the viewpoints of organisations in the sector? | No understanding                           |   |   |   | Very good understanding |   |
|-----------------------------------------------------------------------------------------------------------------------------|--------------------------------------------|---|---|---|-------------------------|---|
|                                                                                                                             | Regulator                                  | 1 | 2 | 3 | 4                       | 5 |
|                                                                                                                             | Univeristy (or equivalent)                 | 1 | 2 | 3 | 4                       | 5 |
|                                                                                                                             | Consultant                                 | 1 | 2 | 3 | 4                       | 5 |
|                                                                                                                             | Insurer/reinsurer                          | 1 | 2 | 3 | 4                       | 5 |
|                                                                                                                             | Broker                                     | 1 | 2 | 3 | 4                       | 5 |
|                                                                                                                             | Research organisation<br>(e.g. Met Office) | 1 | 2 | 3 | 4                       | 5 |
|                                                                                                                             | Model Vendor                               | 1 | 2 | 3 | 4                       | 5 |

1 = no understanding, 2 = some understanding, 3 = average level of understanding, 4 = good understanding, 5 = very good understanding

| 2. <u>Before the Co-RISK workshop</u> , how well do you think you understood factors contributing to the positionality of organisations? | No understanding |   |   |   | Very good understanding |
|------------------------------------------------------------------------------------------------------------------------------------------|------------------|---|---|---|-------------------------|
|                                                                                                                                          | 1                | 2 | 3 | 4 | 5                       |
| Contribution (e.g. skills/data)                                                                                                          | 1                | 2 | 3 | 4 | 5                       |
| Barrier/concern                                                                                                                          | 1                | 2 | 3 | 4 | 5                       |
| Useful output/outcome                                                                                                                    | 1                | 2 | 3 | 4 | 5                       |
| Motivation                                                                                                                               | 1                | 2 | 3 | 4 | 5                       |
| Concern                                                                                                                                  | 1                | 2 | 3 | 4 | 5                       |
| Insertion point of science                                                                                                               | 1                | 2 | 3 | 4 | 5                       |

1 = no understanding, 2 = some understanding, 3 = average level of understanding, 4 = good understanding, 5 = very good understanding

### Was the Co-RISK workshop useful? 1-5 scale quick answer (open ended questions overleaf)

| 3. To what extent was the Co-RISK workshop useful in the following areas? |                                                                                                                                               | No use |   |   | Extremely useful |   |
|---------------------------------------------------------------------------|-----------------------------------------------------------------------------------------------------------------------------------------------|--------|---|---|------------------|---|
|                                                                           | Connecting with new people                                                                                                                    | 1      | 2 | 3 | 4                | 5 |
|                                                                           | Identifying colleagues interested in this topic                                                                                               | 1      | 2 | 3 | 4                | 5 |
|                                                                           | Improving my understanding of organisations' positionality (e.g. regulator, insurer, university)                                              | 1      | 2 | 3 | 4                | 5 |
|                                                                           | Improving my understanding of factors contributing to organisations' positionality (e.g. motivations, barriers, insertion points for science) | 1      | 2 | 3 | 4                | 5 |
|                                                                           | Understanding how to create a project translating risk-related science                                                                        | 1      | 2 | 3 | 4                | 5 |
|                                                                           | The worked examples created                                                                                                                   | 1      | 2 | 3 | 4                | 5 |
|                                                                           |                                                                                                                                               |        |   |   |                  |   |

1 = no use, 2 = a bit useful, 3 = moderately useful, 4 = very useful, 5 = extremely useful

PLEASE TURN OVER

**Would you do a Co-RISK workshop again? 1-5 scale quick answer**

|                                                      | No | Unlikely | Perhaps | Probably | Certainly |
|------------------------------------------------------|----|----------|---------|----------|-----------|
| 4. Would you take part in a future Co-RISK workshop? |    |          |         |          |           |
| As a participant (same topic)                        | 1  | 2        | 3       | 4        | 5         |
| As a participant (different topic)                   | 1  | 2        | 3       | 4        | 5         |
| As a facilitator (i.e. running it)                   | 1  | 2        | 3       | 4        | 5         |

**Was the Co-RISK workshop useful? Open ended questions**

Don't feel you need to fill in everything, these are just prompts for your thoughts.

5. What were the most useful things about the Co-RISK workshop?

6. What were the least useful things about the Co-RISK workshop?

7. Limitations / flaws ?

8. Suggestions for improvement.

If you would like to discuss the workshop further, please provide your name and e-mail below.
