# Supplementary material for: Co-RISK: a tool to co-create impactful university–industry projects for natural hazard risk mitigation
Source: Copernicus journal article supplement (doi:10.5194/gc-7-35-2024), 2024-02-01
Supplement: Supplementary file 3 [file gc-7-35-2024-supplement.zip]

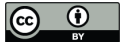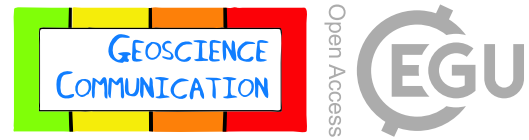

## *Supplement of*

# **Co-RISK: a tool to co-create impactful university–industry projects for natural hazard risk mitigation**

**John K. Hillier and Michiel van Meeteren**

*Correspondence to:* John K. Hillier ([j.hillier@lboro.ac.uk](mailto:j.hillier@lboro.ac.uk))

- [gc-7-35-2024-supplement-title-page.pdf](#)
- [README.docx](#)
- Toolkit
  - Case\_Study\_1
    - \* [Case1\\_TOGETHER\\_1.1.pdf](#)
  - Maps\_Facilitator\_Notes
    - \* [6\\_Co-RISK\\_Maps\\_2.1.pdf](#)
    - \* [6\\_Co-RISK\\_Maps\\_2.1.pptx](#)
    - \* [Facilitator\\_notes.docx](#)
    - \* [Facilitator\\_notes.pdf](#)
    - \* [Map1\\_blank.pdf](#)
    - \* [Map2\\_blank.pdf](#)
    - \* [Map3\\_blank.pdf](#)
  - Presentation
    - \* [Presentation.pptx](#)
    - \* [Timing\\_Organisational\\_Detail.docx](#)
- Workshop\_Evaluation
  - [Beta\\_Test\\_Eval\\_1.4.pdf](#)
  - [CoRISK\\_Eval\\_1.1\\_results.xlsx](#)

The copyright of individual parts of the supplement might differ from the article licence.
