# Supplementary material for: Co-RISK: a tool to co-create impactful university–industry projects for natural hazard risk mitigation
Source: Copernicus journal article supplement (doi:10.5194/gc-7-35-2024), 2024-02-01
Supplement: Supplementary file 5 [file Timing_Organisational_Detail.docx]

**Workshop – Co-RISK**

**
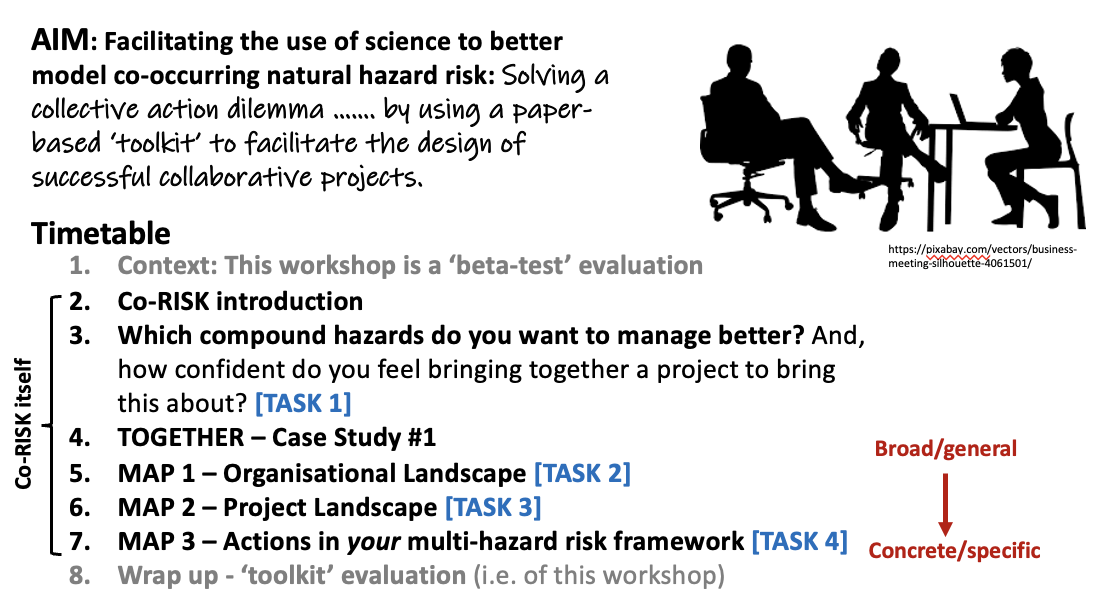
**

**Workshop objective:** Test a 'toolkit' for designing a framework and project to evaluate a co-occurring hazard scenario in terms of a business decision or regulation, for stakeholders without the experience of having done it to help them proceed efficiently and effectively.

**Workshop activities:** Participants will be asked to take part in a number of activities, both individually and as part of a group to gather information on their perspective on how university science can be better integrated into decision-making processes in their sector (e.g. insurance).

| **TIME-FRAME** (indicative) | **ACTIVITY** | **PURPOSE** |
| --- | --- | --- |

- Give context
- Break ice
- Establish hazard co-occurrences of interest for later

1. **Introduction** to ROBUST, potential impact of co-occurring hazards, and warm-up exercise: **Brain-storm list of hazard interactions of most interest.**

30 mins

In groups. Brainstorm list. Rank importance using dots - 3 dots each person. Collate to list to get top 10 on flip chart. Then, use different colour pen for each organisation type (e.g. scientist, regulator) to use dots to again rank importance. Also provide sticky notes for anonymous comment ... again, colour by organisation type.

- Establish all potentially interested parties in the work
- Determine broad **Motivations, barriers, possible contributions, required outputs**
- And, most importantly, exactly **where the science might be inserted** into processes decisions

2. STEP 1 - **Map the organisational landscape**.

30 mins

Groups to fill in template maps. Rank importance, again using dots. This time, just two colours 'home' and 'away' i.e. in your organisation type and not.

3. STEP 2 - **Map the project landscape:** repeat STEP 1 for a specific project from the brainstormed list

30 mins

- Actually create a framework, project design for the hypothetical project selected to give experience of this.

4. STEP 3 - **Map the project outline / framework** (i.e. climate -> hazard -> impact -> implications)**.**

30 mins

Groups to fill in template framework, focussed by questions to prompt considerations of potential weakness, insights gleaned from the TOGETHER project.

For illustrative facilitator prompts for STEPS 1-3 within the workshop see **Facilitator_notes.docx**.
