# Supplementary material for: Co-RISK: a tool to co-create impactful university–industry projects for natural hazard risk mitigation
Source: Copernicus journal article supplement (doi:10.5194/gc-7-35-2024), 2024-02-01
Supplement: Supplementary file 6 [file CoRISK_Eval_1.1_results.xlsx]

## Sheet: Responses
ID	Years Experience	Worked for/at (organisation)									Worked for/at (role)					Seniority	Knowledge before - Organisational viewpoints							Knowledge before - Positionality factors						Co-RISK useful?						Again?			Most useful things about Co-RISK	Least useful things about Co-RISK	Limitations/flaws	Improvement suggestions
	1	2a	2b	2c	2d	2e	2f	2g	2h	2i	3a	3b	3c	3d	3e	4	5a	5b	5c	5d	5e	5f	5g	6a	6b	6c	6d	6e	6f	7a	7b	7c	7d	7e	7f	8a	8b	8c	9	10	11	12
	Yrs	ins	reins	ven	cons	inv	reg	brok	uni	Rorg	Risk	Man	Sci	KE	Poli	Rank	reg	uni	cons	ins	brok	Rorg	ven	Cont	Barr	Usef	Mot	Conc	Pins	NewP	ID	IPos	IFac	Upr	Egs	Same	Dif	Faci
1	0	0	0	0	0	0	0	0	0	1	0	0	1	0	0	1	2	5	3	2	2	5	2	4	3	3	5	3	4	5	5	5	5	5	5	4	5	4	Documents sent ahead to get some familiarity Bringing together people from diverse backgrounds Designed to group participants with strangers Structure suggested by flexible with adaptation encouraged.			More time and networking would be great (perhaps optional extra time after pre-advertised) Circulate primer/intro to industry for those less familiar Questionnarie later for further thoughts
2	0	0	0	0	0	0	0	0	1	0	0	0	1	0	0	1	3	4	1	2	1	3	2	4	3	3	4	2	2	5	4	4	5	4	3	5	5	3	Maps 1&2 were useful in developing understanding of stakeholders, generalised enough detail but not overwhelming. I have a much better understanding of barriers.	I found map 3 less useful since we could not go into enough detail in time	The map 3 boxes wre slightly confusing and the examples did not entirely help. Probably as I did not [… ?? ...] / modelling
3	0	0	0	0	0	0	0	0	1	0	0	0	1	0	0	1	4	5	4	3	2	5	3	4	4	3	3	3	3	5	4	5	4	5	3	4	5	5	Networking opportunity Understanding how different organisations work.	Exercise 1 - was hard to do for a sector you don't know about sto we skipped to our particular strengths.	Generally this works really well to factilitate useful discussions and although filling in the sheets is difficult, the colours are useful. We had a good group but this could be hard in a quiet group.	Some of the charts (the final one mainly) were difficult to fill in e.g. distinguishing some contributions from outputs
4	6	1	1	0	0	0	0	0	0	0	1	0	1	0	0	2	3	3	3	4	4	2	4	3	3	4	4	3	4	4	4	3	3	4	3	4	4	2	Speaking to others from different sectors to hear their ideas/concerns Seeing a potential framework laid out in writing with concurrence from different people across different sectors	Time spent talking about this - are we any closer to solving this problem?	Generic/project specific plans probably too much time writing down - project time-line more useful What are the tangible outputs from this - not sure if clear?	Maybe suggest 3 topics from contributions from attendees before the session, then spend 3 hrs going through the project framework + allow for more detail.
5	11	0	0	0	1	0	1	1	0	0	1	1	0	0	1	2	5	4	4	5	5	2	4	5	3	3	4	3	4	4	3	3	3	2	3	2	3	2	Remind my self that you can't take the academic thinking out of insurance risk specialists easily	Use of terms that are difficult to digest in a short period of time, e.g. positionality.	Time: probably 4 hrs were the max people could take out of their day but difficult to assess well the plausibiilty of a project	People coming more prepared, tasks being more specific, shuffling of tables.
6	12	0	0	0	0	0	0	1	0	0	1	0	0	0	0	2	3	4	1	4	5	4	5	3	4	4	4	4	4	3	3	4	4	4	4	5	5	3	Good opportunity to see other people's perspectives regarding the process/priorities to building a CAT model	See little advantage to voting for the best project in the end	Time is a limitation
7	15	0	1	1	0	0	0	1	0	1	0	1	0	0	0	3	2	4	3	5	5	4	4	4	4	3	3	4	4	5	4	4	3	4	3	2	4	2	Way of thinking about project and implications Network with people Share ideas on compounded risks
8	4	0	0	1	0	0	0	1	1	0	1	0	1	0	0	1	4	4	3	4	4	3	5	5	4	4	4	4	3	3	4	4	4	4	4	5	5	4	Gaining holistic view with respect to motivations & impact		Workshop a little hurried	Whole day Wider industry representation
9	0	0	0	0	0	0	0	0	1	0	0	0	1	0	0	1	1	3	1	1	1	2	1	3	2	4	3	2	3	5	4	4	3	3	2	4	3	2	Networking Brainstorming ideas with people in range of roles / sectors		Struggled to focus in on a specific project idea - could somehow use prompt to help do this
10	7	0	0	1	0	0	0	1	0	0	0	0	1	0	0	1	3	4	3	4	4	2	4	3	2	2	3	2	2	4	3	4	4	4	3	4	4	2	Understanding project framework and how I might plan projects			Increased attendence including more senior positions
11	10	1	1	0	1	1	1	0	0	0	1	1	0	0	0	3	4	2	4	5	3	2	2	3	2	4	3	2	5	4	4	4	3	4	3	5	5	5	Intersting shift in position / cocept perception		Unclear difference between Map 1, Map 2 and Map 3. Might need more clear steer, and transition support facilitation.
12	14	0	0	1	0	0	0	0	0	0	0	1	0	0	0	3	5	4	5	5	5	3	5	4	3	4	4	4	3	4	4	3	3	3	3	4	4	3	Hearing from colleagues
	NA = Unanswered numerical [Likert-scale] question
	[… ?? ...] indicates unreadable handwriting
