# Supplementary figures and images for: Co-RISK: a tool to co-create impactful university–industry projects for natural hazard risk mitigation
Source: Copernicus journal article supplement (doi:10.5194/gc-7-35-2024), 2024-02-01

## MAP 1

## ORGANISATIONAL LANDSCAPE:

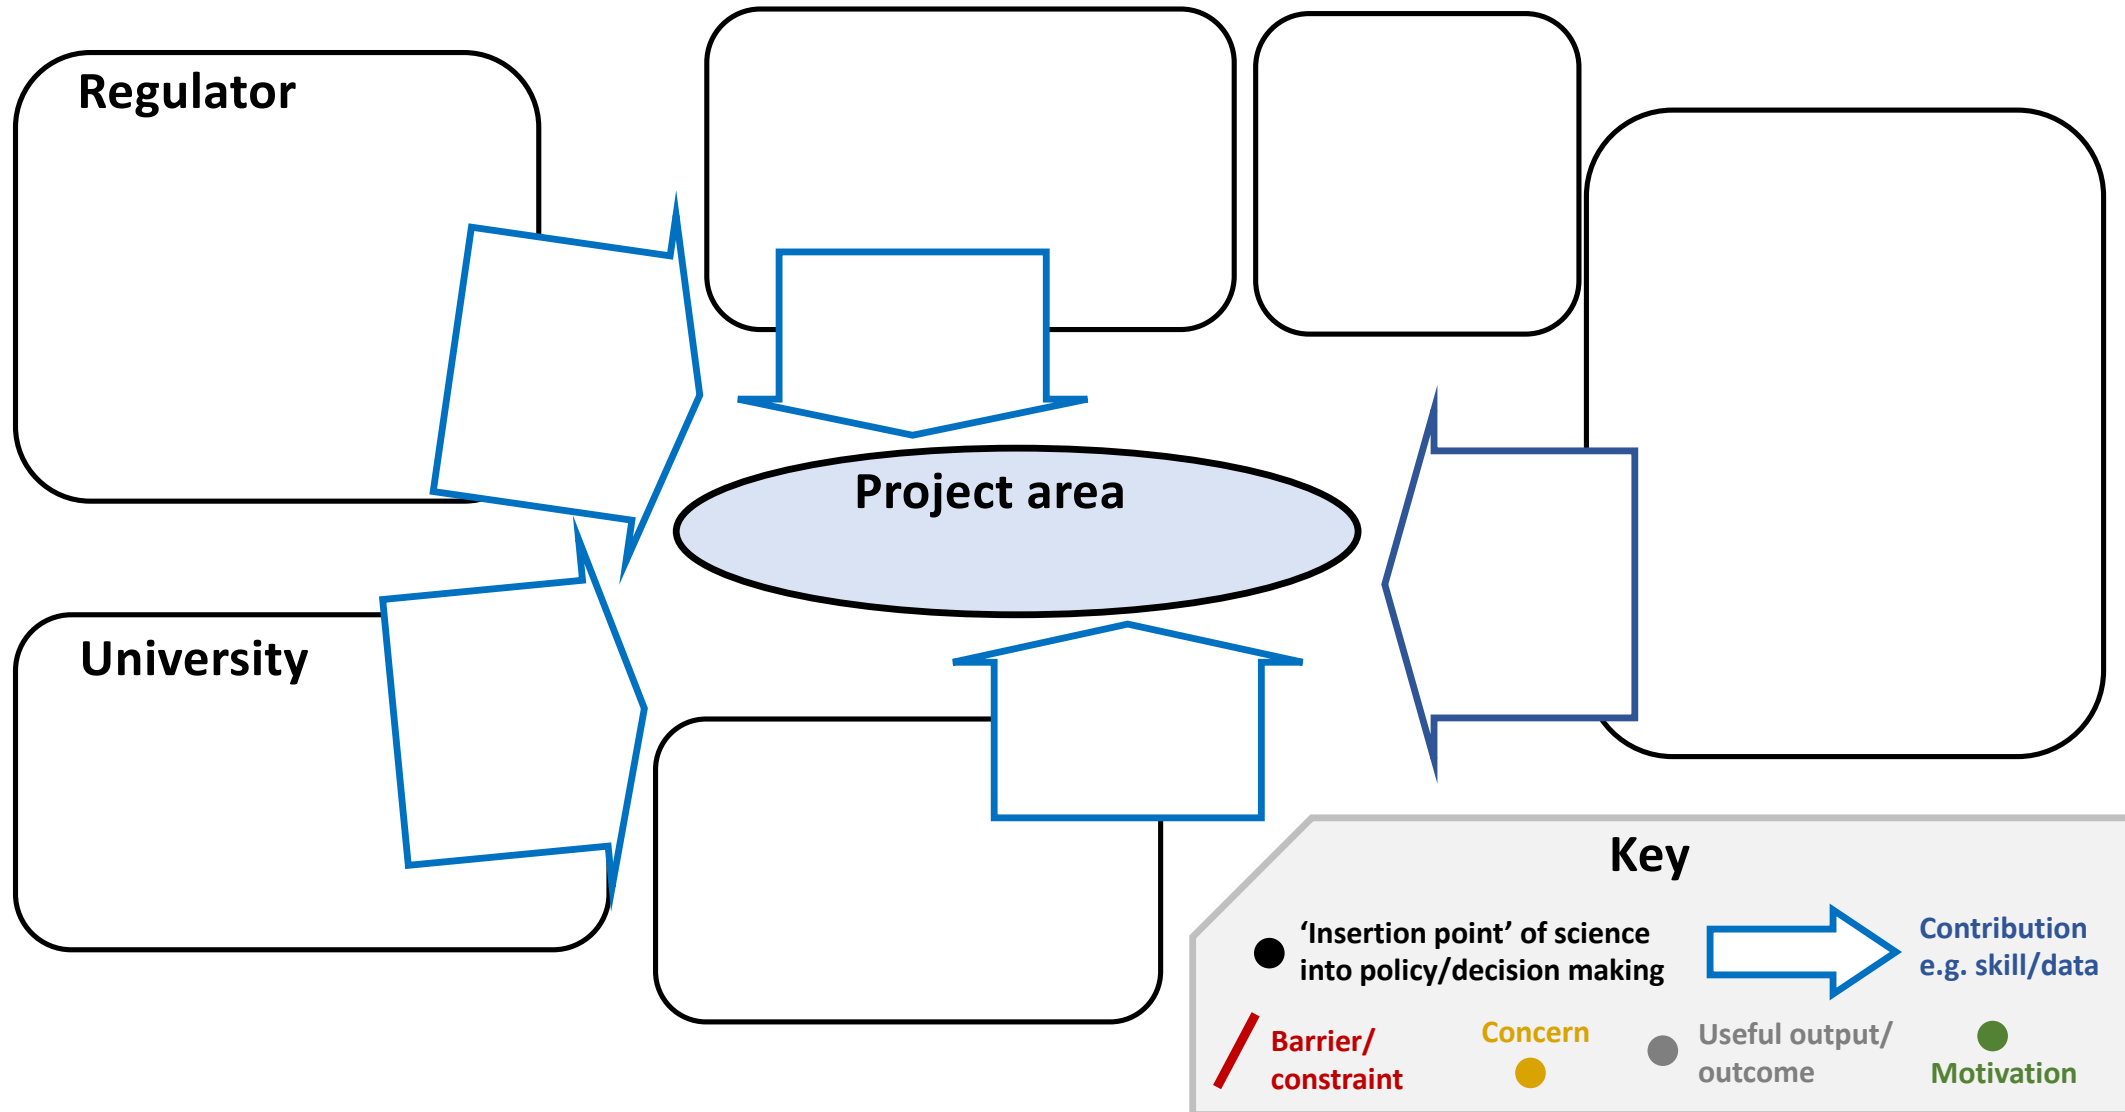

Supplement: Supplementary file 1 [file gc-7-35-2024-supplement.zip]

## MAP 2

## PROJECT LANDSCAPE:



Supplement: Supplementary file 5 [file gc-7-35-2024-supplement.zip]

**MAP 3****PROJECT PLANNER:**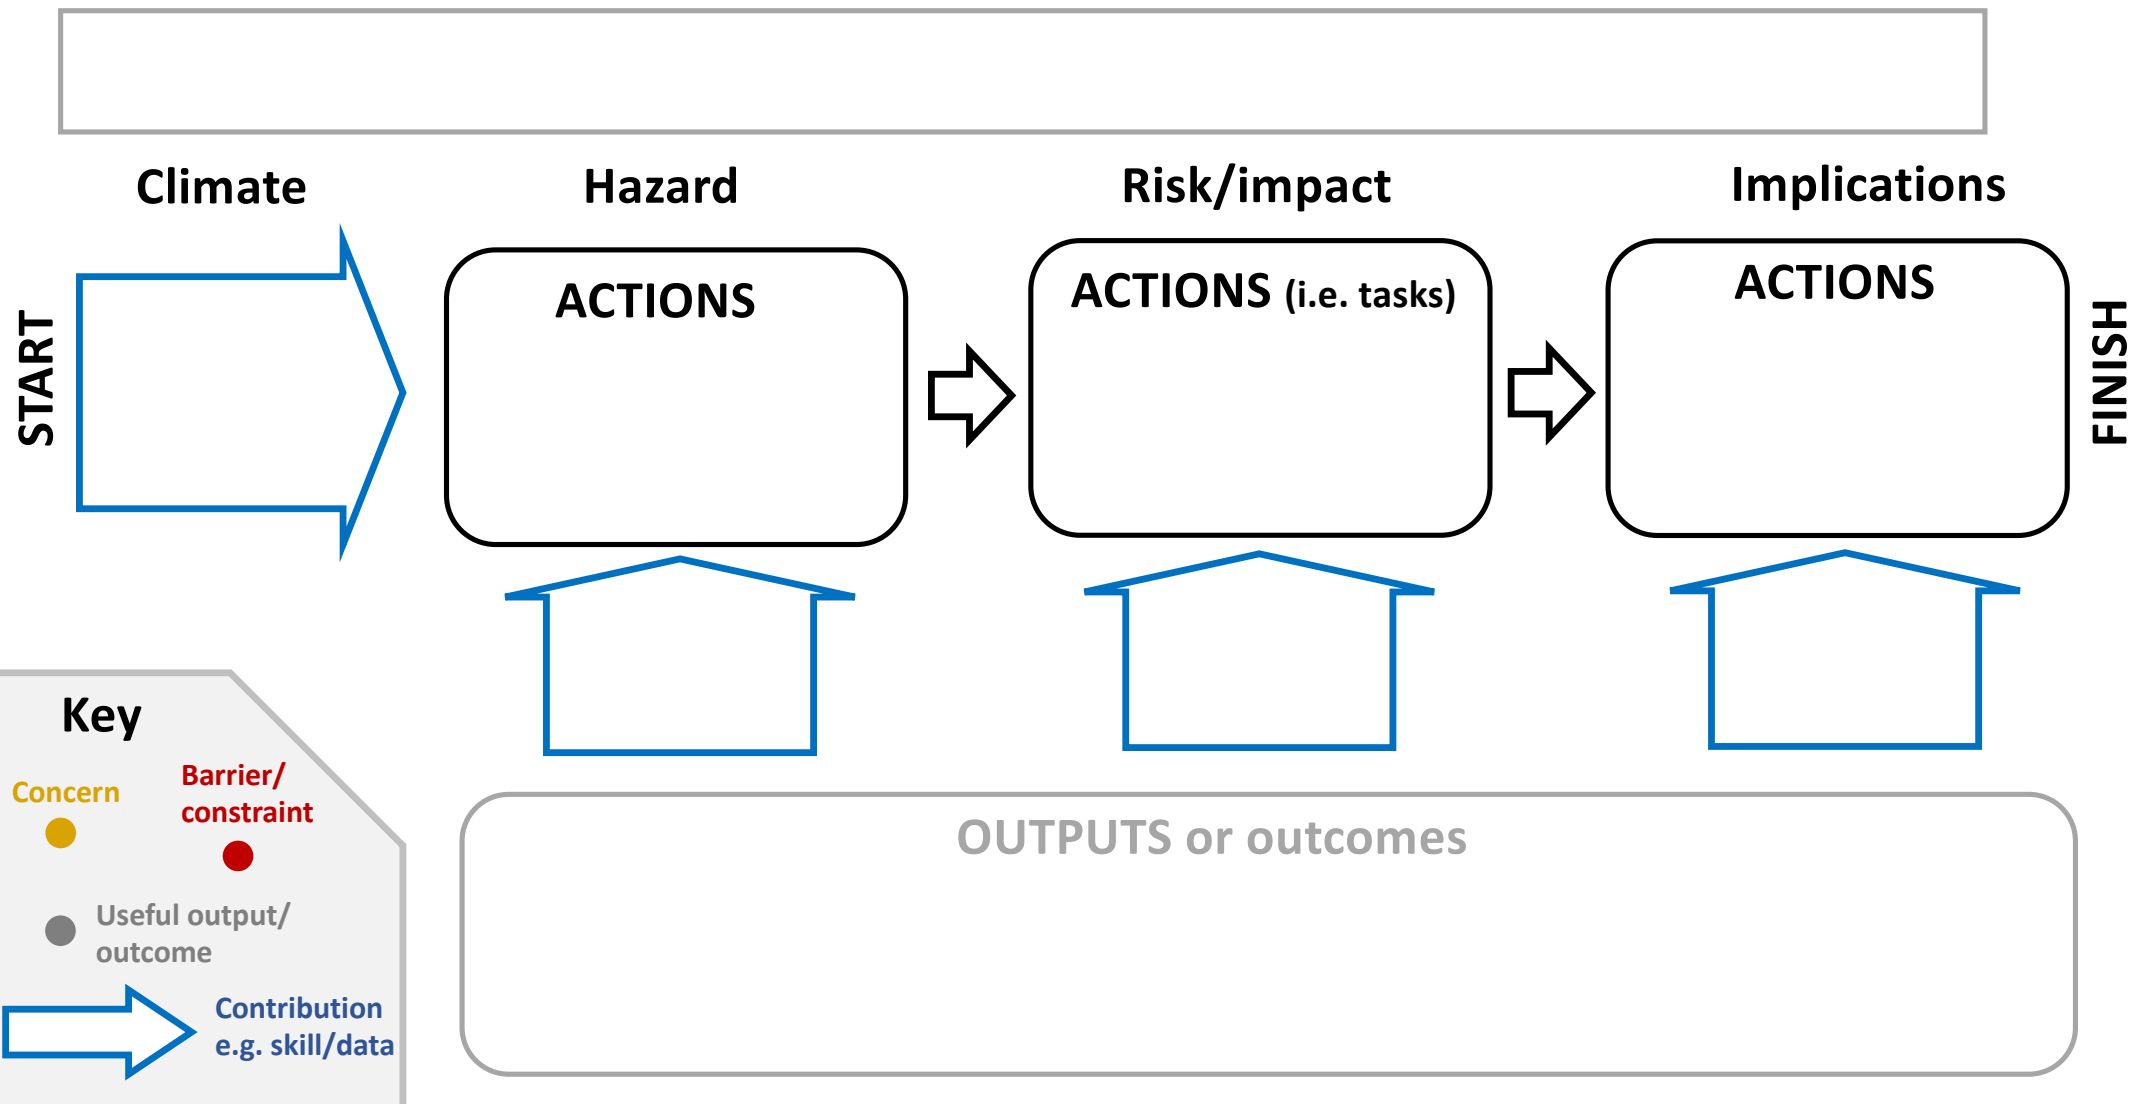

Supplement: Supplementary file 6 [file gc-7-35-2024-supplement.zip]
